# Supplementary material for: Gratitude and Mortality Among Older US Female Nurses
Source: PubMed Central journal article supplement (PMC11223047; doi:10.1001/jamapsychiatry.2024.1687), 2024-07-03
Supplement: jamapsychiatry-e241687-s002.pdf [file jamapsychiatry-e241687-s002.pdf]

## Data Sharing Statement

Chen. Gratitude and Mortality Among Older US Female Nurses. *JAMA Psychiatry*. Published July 03, 2024. doi:10.1001/jamapsychiatry.2024.1687

### Data

**Data available:** No

### Additional Information

**Explanation for why data not available:** Data of the Nurses' Health Study (NHS) are not publicly available. Further information including the procedures to obtain and access data from NHS is described at <https://www.nurseshealthstudy.org/researchers> (email: [nhsaccess@channing.harvard.edu](mailto:nhsaccess@channing.harvard.edu)).
